# Supplementary material for: Zn-Enhanced Asp-Rich Antimicrobial Peptides: N-Terminal Coordination by Zn(II) and Cu(II), Which Distinguishes Cu(II) Binding to Different Peptides
Source: MDPI journal article supplement (doi:10.3390/ijms22136971), 2021-06-28
Supplement: s1 [file s1]

## Supplementary Information

Zn-enhanced Asp-rich antimicrobial peptides: N-terminal coordination by Zn(II) and Cu(II), which distinguishes Cu(II) binding to different peptides

A.

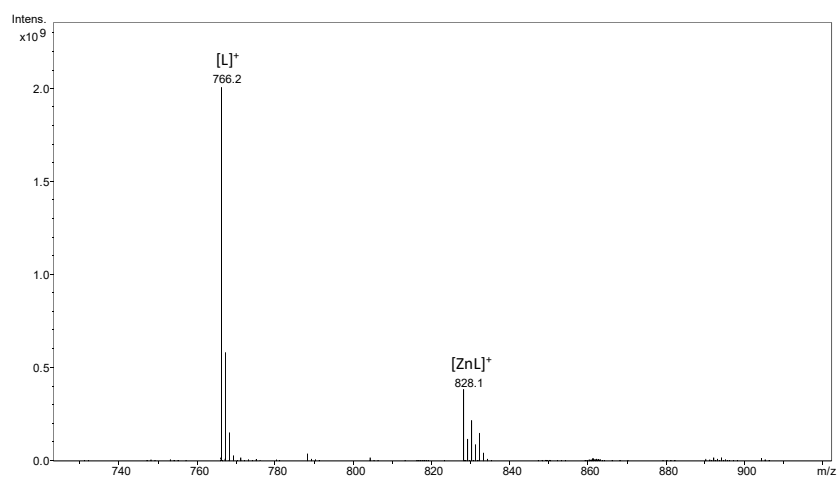

B.

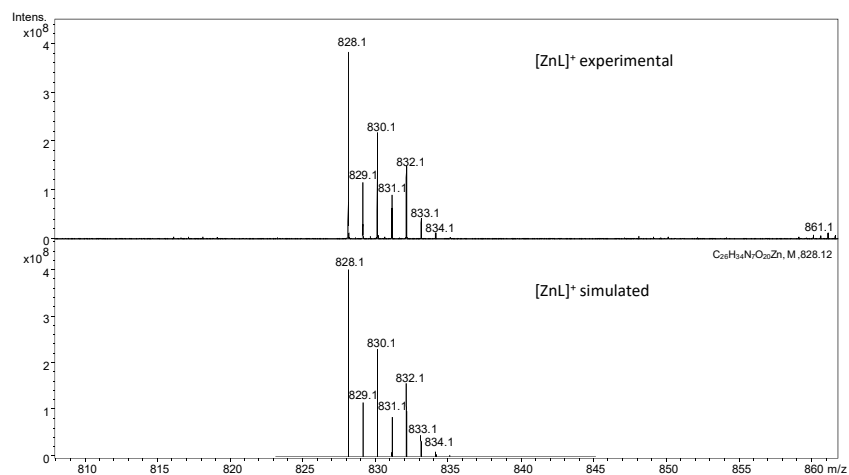

C.

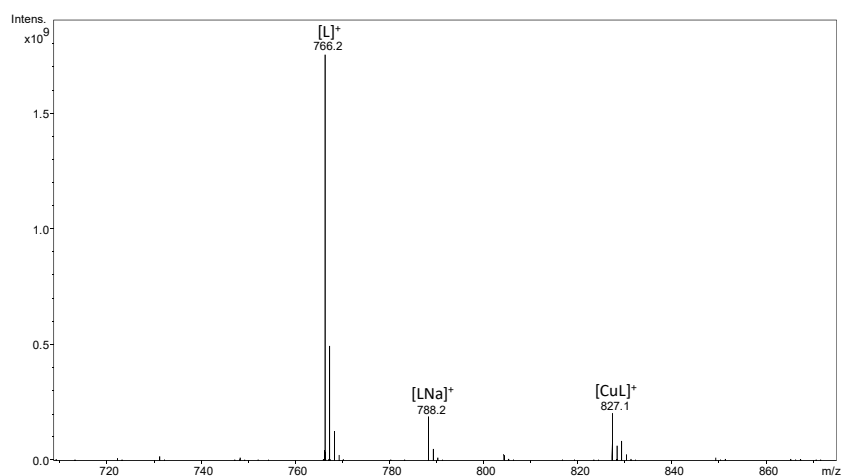

D.

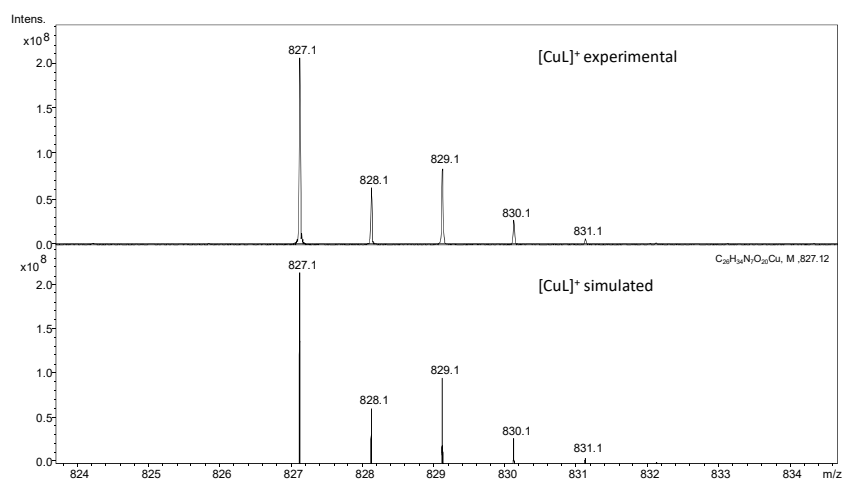

E.

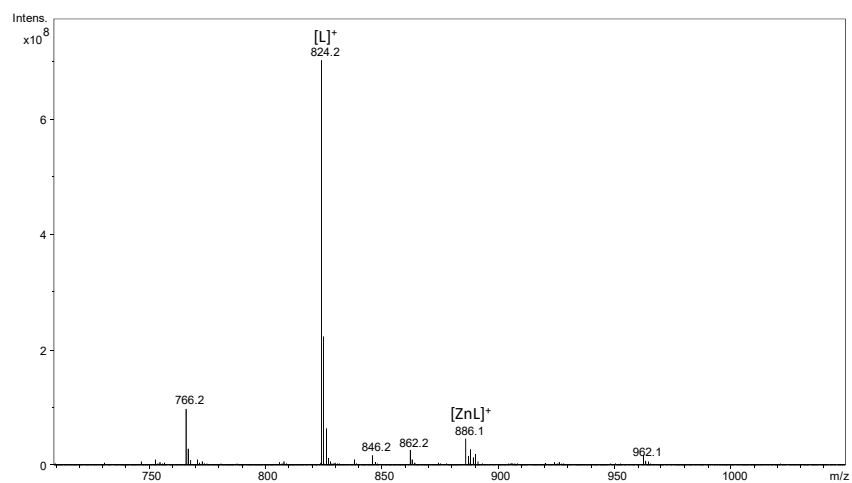

F.

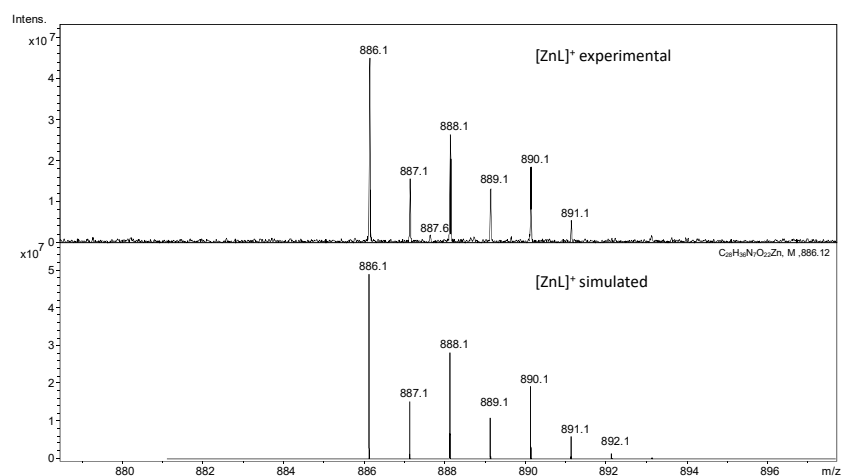

G.

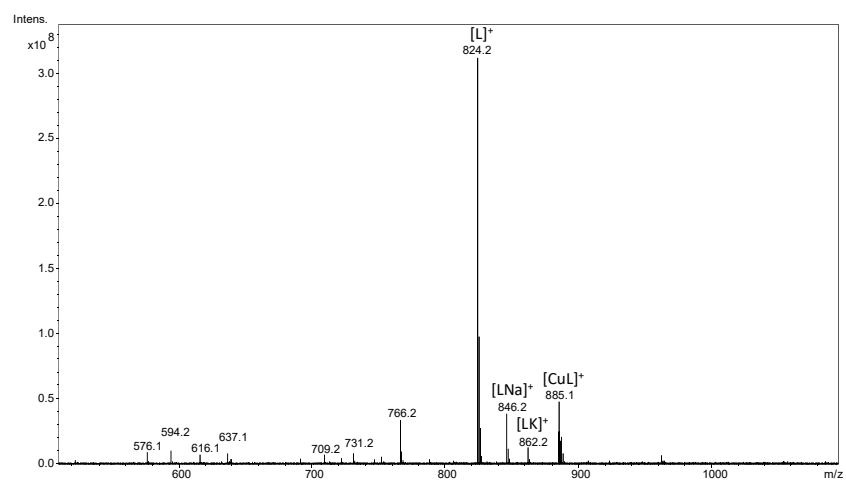

H.

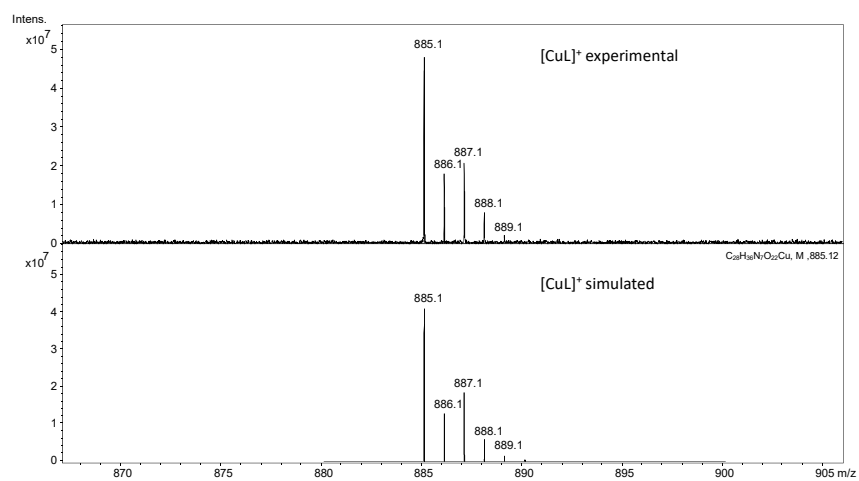

I.

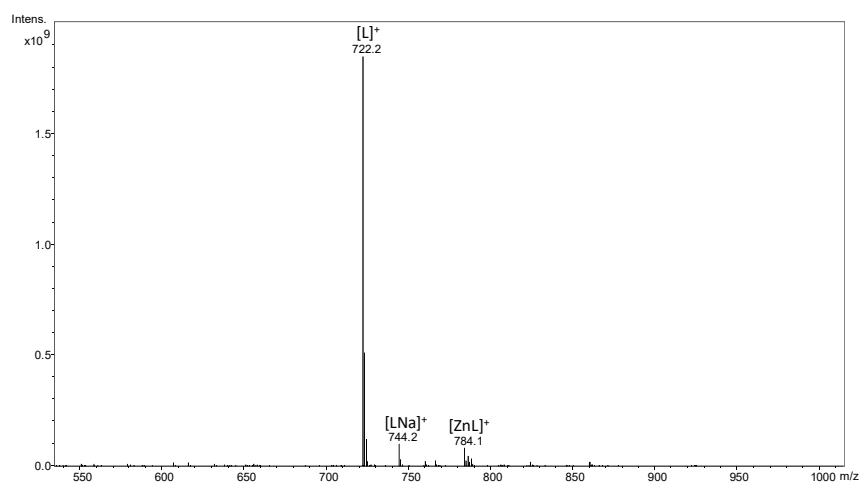

J.

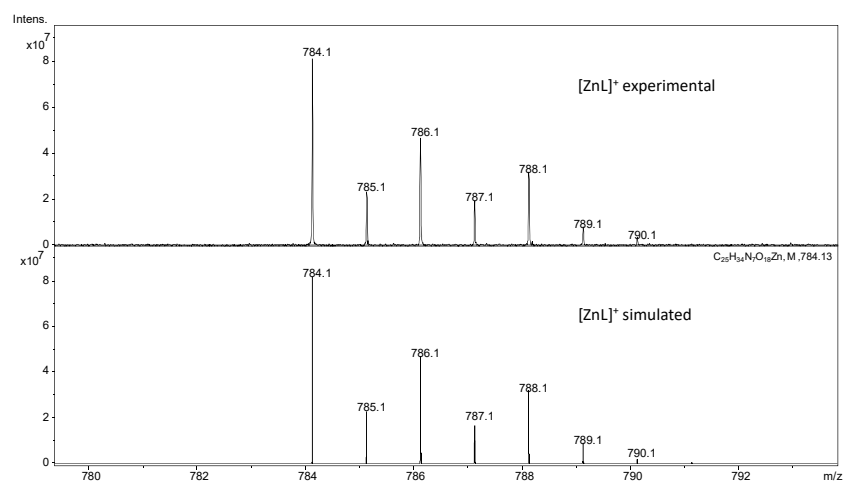

K.

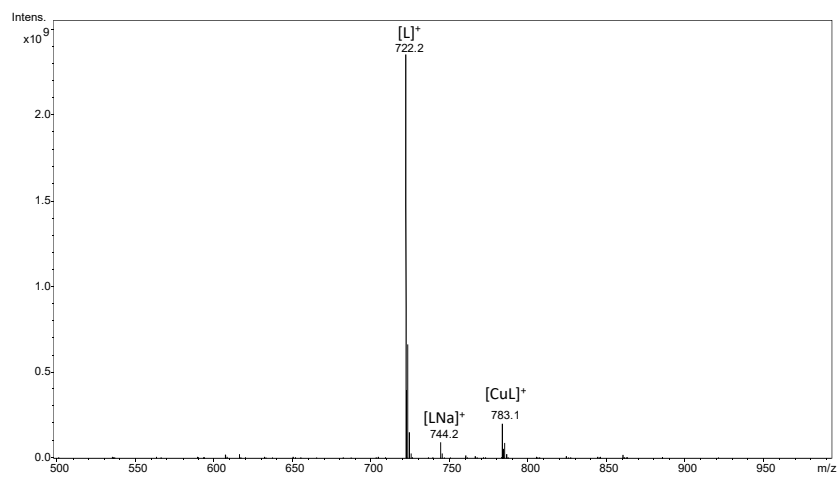

L.

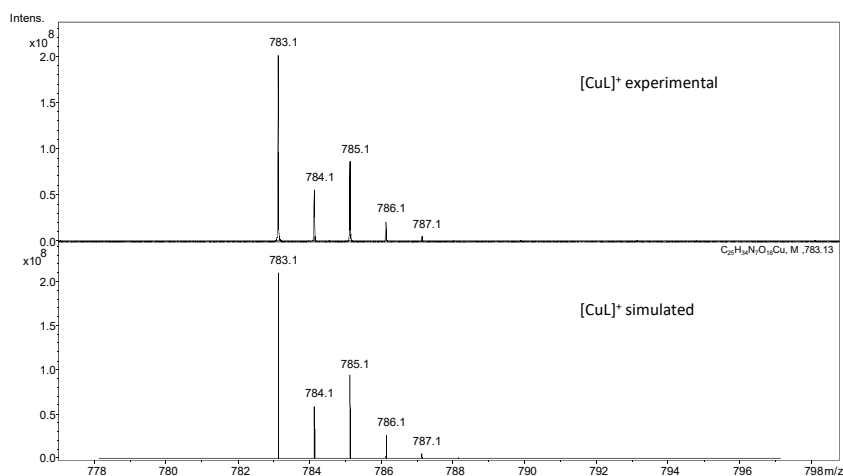

**Figure S1** MS spectra of Zn(II)-SAAP2 (A,B), Cu(II)-SAAP2 (C,D), Zn(II)-SAAP3 (E,F), Cu(II)-SAAP3 (G,H), Zn(II)-SAAP6 (I,J), Cu(II)-SAAP6 (K,L) samples. In the B, D, F, H, J, and L spectra, the experimental (top) and simulated (bottom) results are compared to clearly show the presence of the complex. Conditions:  $[\text{Zn(II)}] = [\text{Cu(II)}] = [\text{SAAP2}] = [\text{SAAP3}] = [\text{SAAP6}] = 3 \times 10^{-4} \text{ M}$  in a 1:1 methanol-water mixture;  $M^{2+}$ :peptide ratio was 1:1

A.

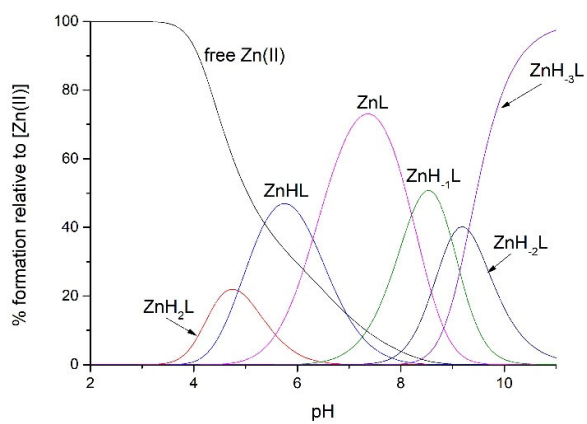

B.

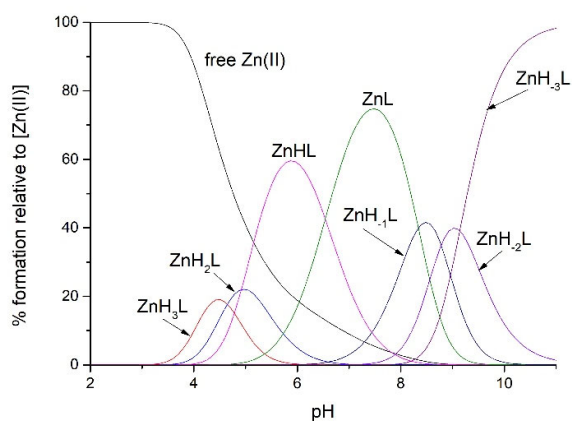

C.

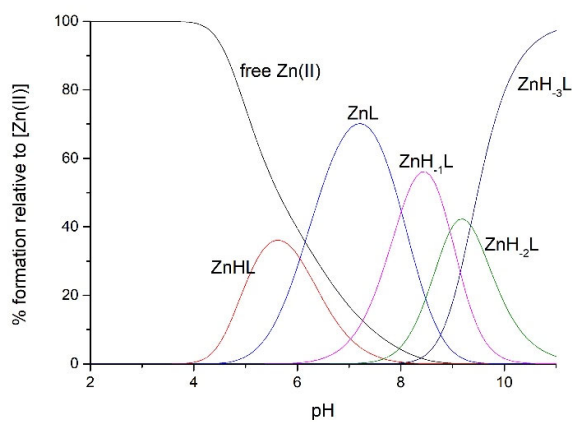

**Figure S2** Distribution diagrams for Zn(II) complexes with SAAP2 (A), SAAP3 (B) and SAAP6 (C);  $T = 298\text{ K}$ ,  $0.1\text{ M NaClO}_4$ ,  $[\text{Zn(II)}] = 0.5 \times 10^{-3}\text{ M}$ ; Zn(II):peptide molar ratio = 1:1

A.

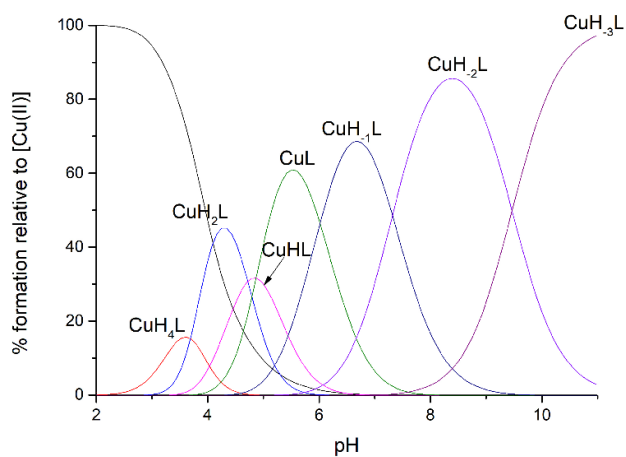

B.

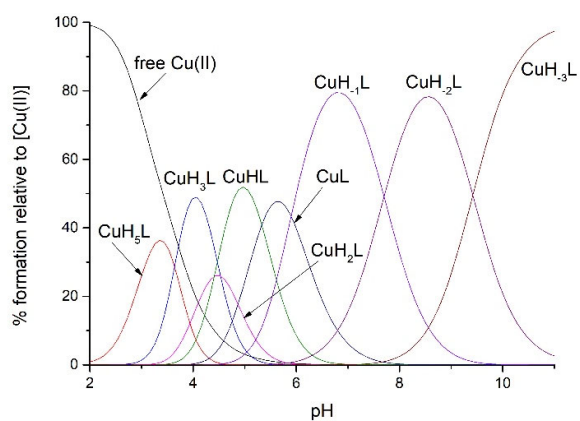

C.

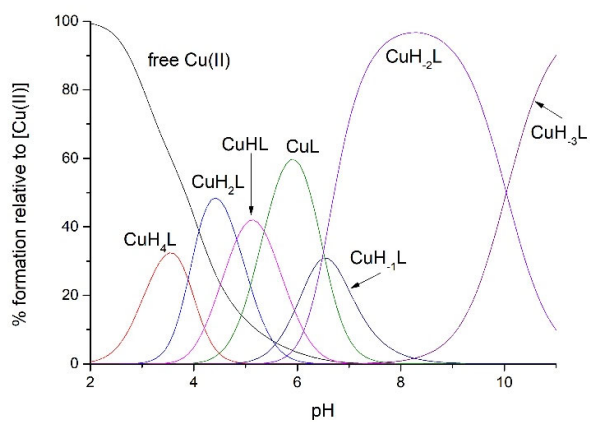

**Figure S3** Distribution diagrams for Cu(II) complexes with SAAP2 (A), SAAP3 (B) and SAAP6 (C);  $T = 298\text{ K}$ ,  $0.1\text{ M NaClO}_4$ ,  $[\text{Cu(II)}] = 0.5 \times 10^{-3}\text{ M}$ ; Cu(II):peptide molar ratio = 1:1

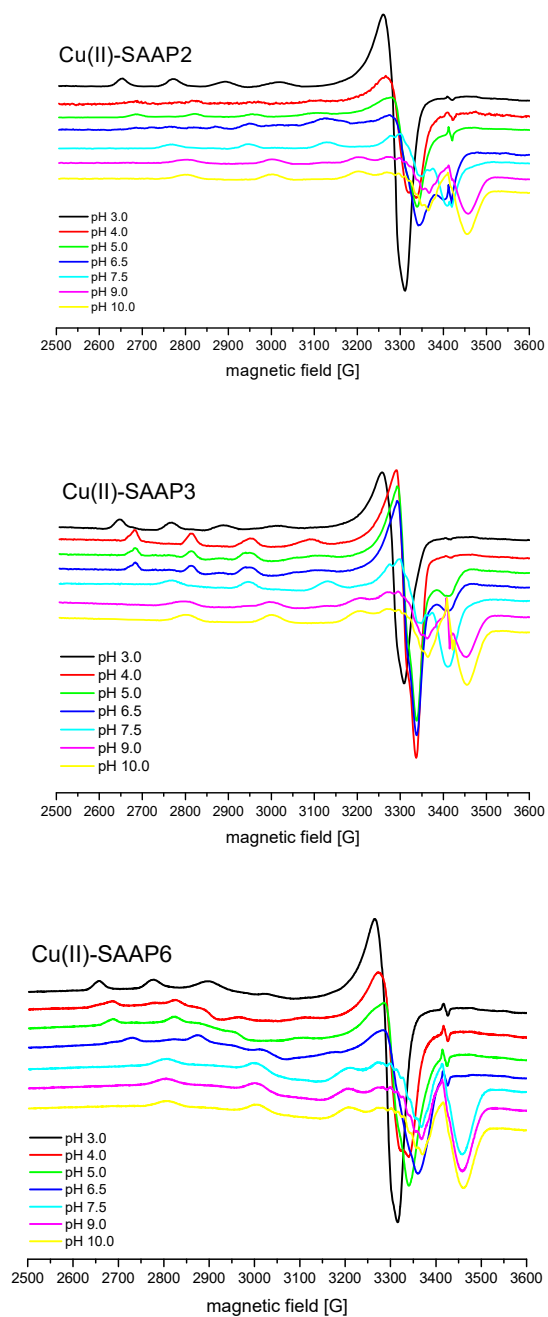

**Figure S4** X-band EPR spectra of frozen solutions (77 K) of Cu(II)-SAAP2, Cu(II)-SAAP3 and Cu(II)-SAAP6 at pH values between 3.0 and 10.0 (Cu(II)-peptide molar ratio = 1:1). Samples were in a buffered aqueous solution with 30% ethylene glycol as a cryoprotectant. Note, sharp signal at 3420 G is due to a contaminant in the cavity (see Figure S7).



A.

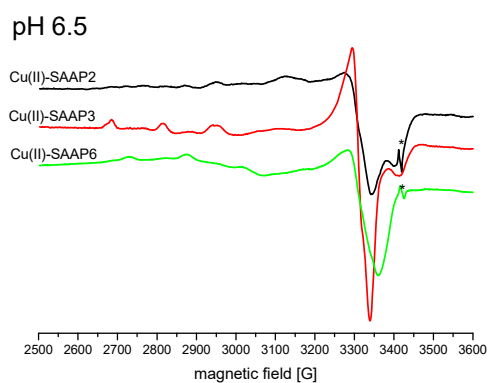

B.

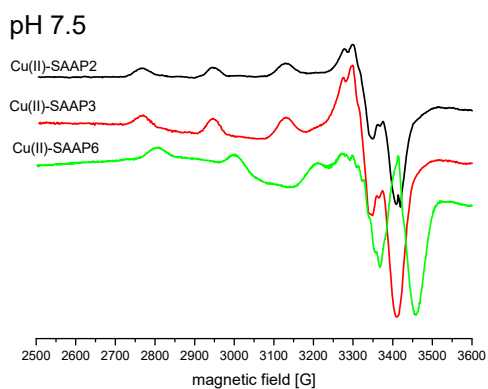

C.

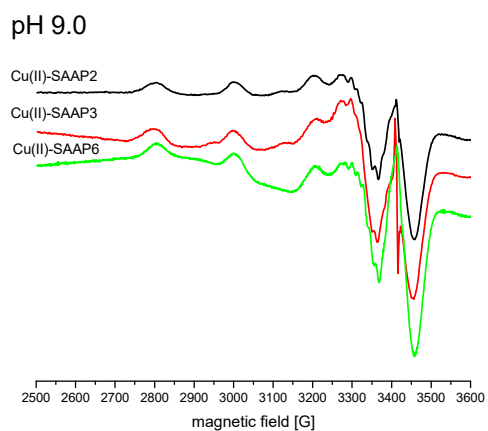

**Figure S5** Comparison of experimental X-band EPR spectra of frozen solutions (77 K) of Cu(II)-SAAP2 (black), Cu(II)-SAAP3 (red) and Cu(II)-SAAP6 (green) (Cu(II)-peptide molar ratio = 1:1) at pH 6.5 (A), 7.5 (B) and 9.0 (C). Samples were in a buffered aqueous solution with 30% ethylene glycol as a cryoprotectant. Note, sharp signal at 3420 G is due to a contaminant in the cavity (see Figure S7).

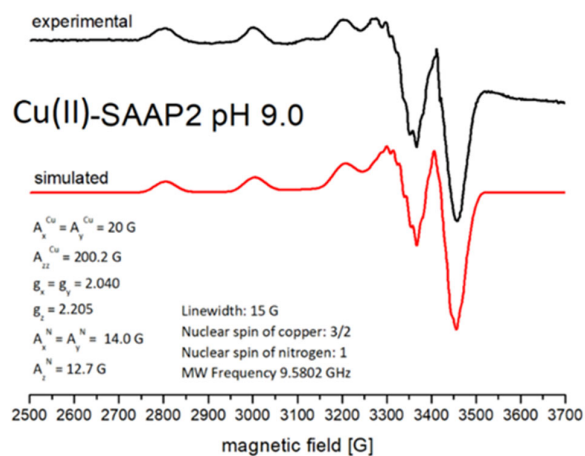

**Figure S6** Experimental (black) and simulated (red) EPR spectra of Cu(II)-SAAP2, confirming 4N coordination at pH 9. Similar simulation values were obtained for the analogous EPR spectra of Cu(II)-SAAP3 and Cu(II)-SAAP6.

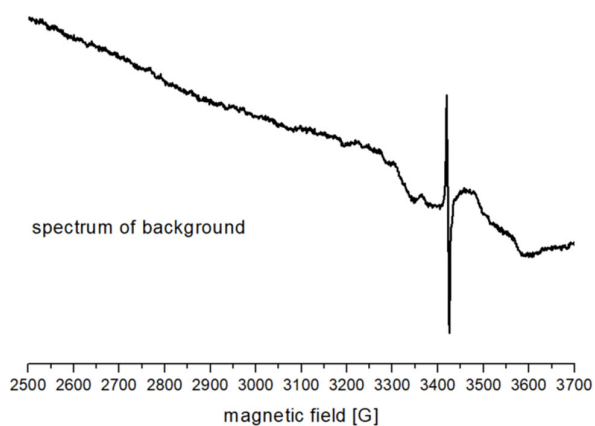

**Figure S7** The background spectrum obtained from the Bruker ELEXSYS E500 CW-EPR spectrometer before measurements of the Cu(II)-SAAP samples.

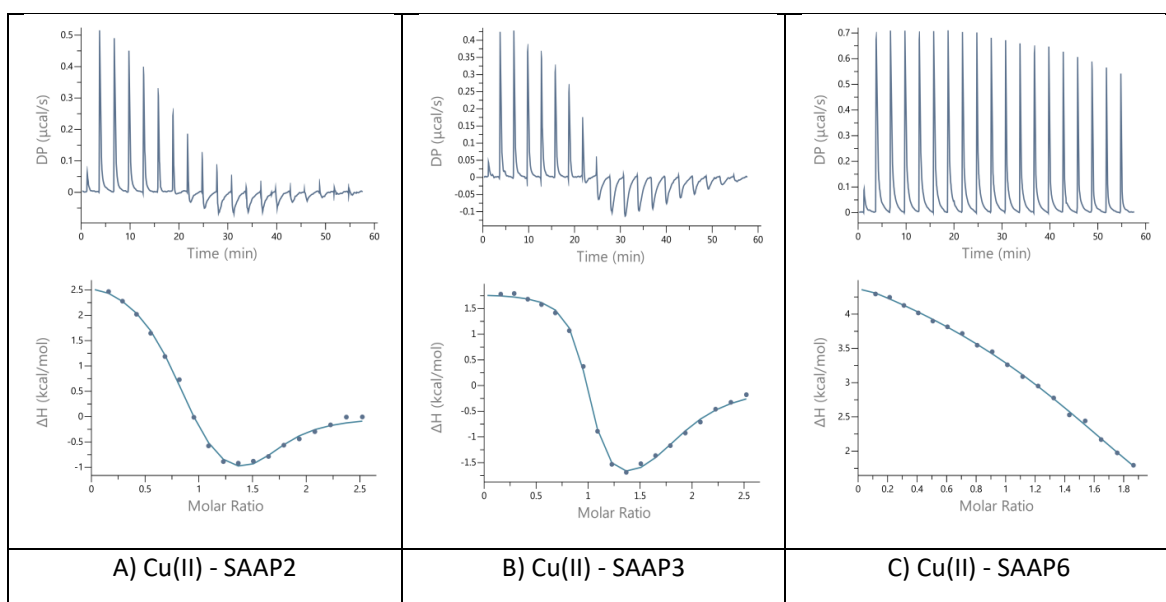

**Figure S8** ITC titrations (raw data above; plots of integrated concentration-normalized data below) of 1.8-2 mM Cu(II) titrated into 150-200  $\mu$ M of: A) SAAP2; B) SAAP3; and C) SAAP6 peptides (25 mM Caco buffer, pH 6.8).

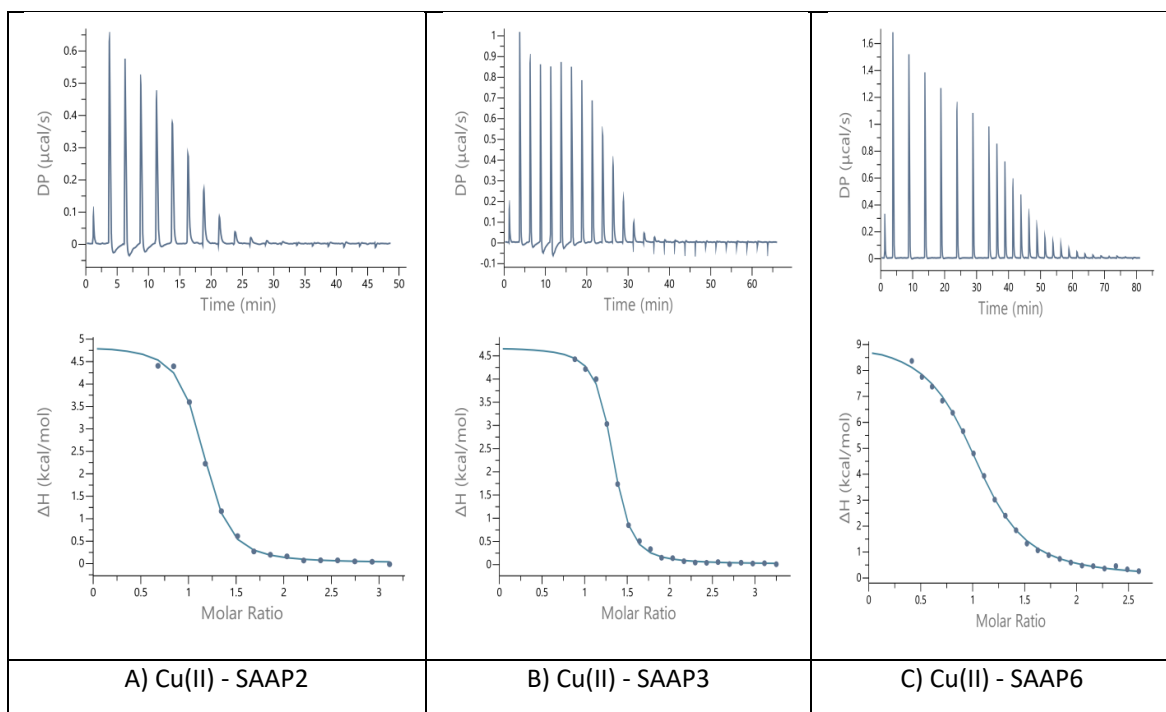

**Figure S9** ITC titrations (raw data above; plots of integrated concentration-normalized data below) of A) SAAP2, B) SAAP3 and C) SAAP6 peptides titrated into solutions of Cu(II) ions (25 mM Caco buffer, pH 6.8).
